# Supplementary material for: Azobenzene–siloxane hybrids with lamellar structures from bridge-type alkoxysilyl precursors
Source: Royal Society of Chemistry journal article supplement (doi:10.1039/c4ra01709a), 2014-01-01
Supplement: c4ra01709a1.pdf [file c4ra01709a1.pdf]

Electronic Supplementary Information (ESI)

**Azobenzene–siloxane hybrids with lamellar structures from bridged-type alkoxyethyl precursors**

Sufang Guo,<sup>a</sup> Watcharop Chaikittisilp,<sup>a</sup> Tatsuya Okubo<sup>a</sup> and Atsushi Shimojima<sup>b,\*</sup>

<sup>a</sup> Department of Chemical System Engineering, The University of Tokyo, 7-3-1 Hongo, Bunkyo-ku, Tokyo 113-8656, Japan.

<sup>b</sup> Department of Applied Chemistry, Waseda University, 3-4-1 Ohkubo, Shinjuku-ku, Tokyo 169-8555, Japan. E-mail: shimojima@waseda.jp

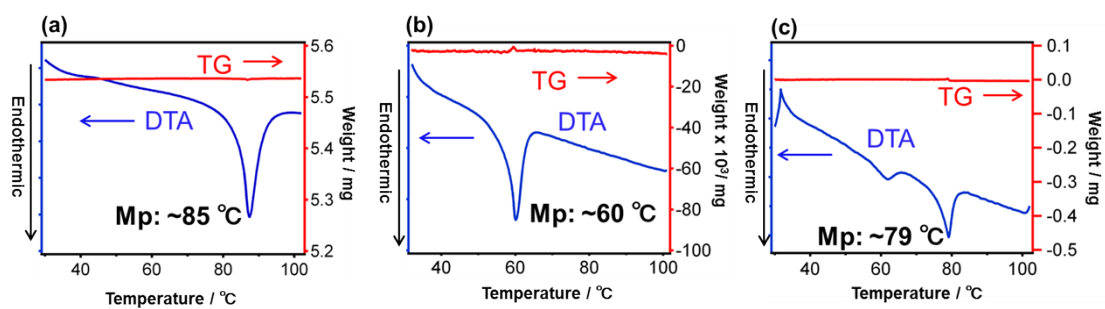

**Fig. S1** TG-DTA curves of (a) **1**, (b) **2** and (c) **3** precursors.

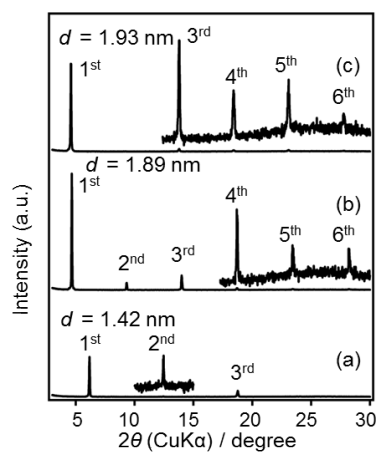

**Fig. S2** XRD patterns of (a) **1**, (b) **2** and (c) **3** precursor films.

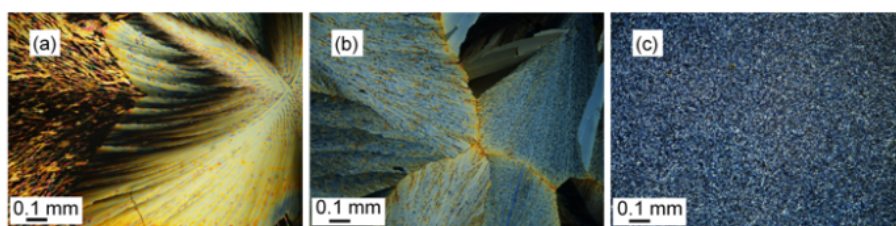

**Fig. S3** POM images of (a) **1**, (b) **2** and (c) **3** precursor films.

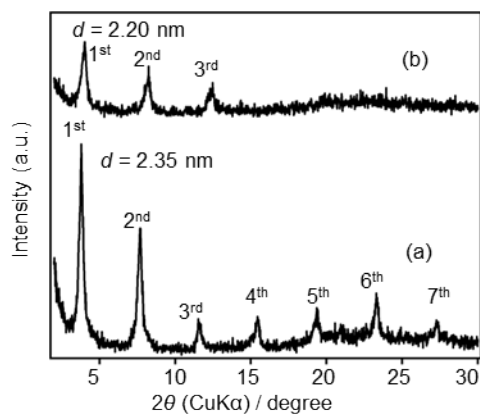

**Fig. S4** Powder XRD patterns of (a) as-formed precipitates (**P1** before heating) and (b) **P1** (after heating of (a))

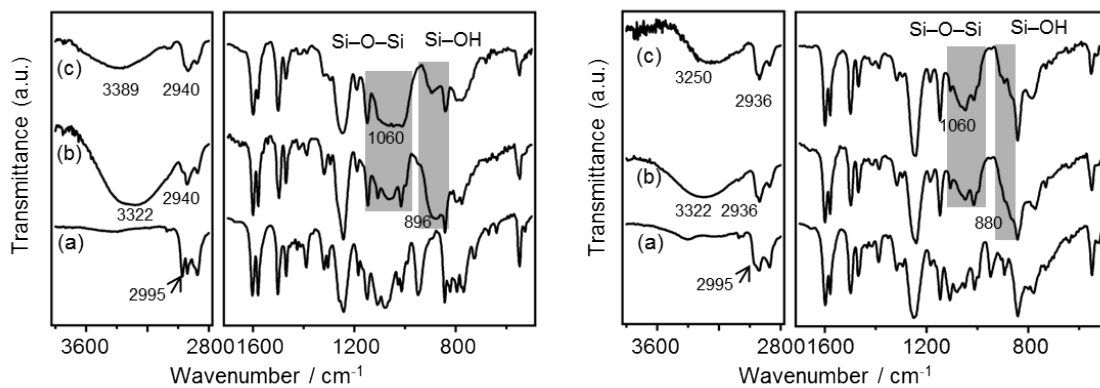

**Fig. S5** FT-IR spectra of **F2** (left) and **F3** (right): (a) precursor (b) after hydrolysis (c) after polycondensation

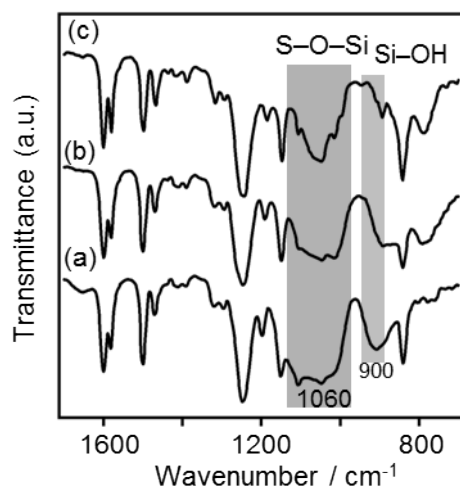

**Fig. S6** FT-IR spectra of (a) **F1'**, (b) **F2'**, and (c) **F3'**.

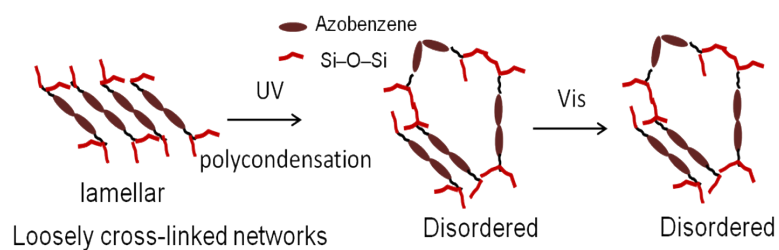

**Scheme S1** Structure changes of **F2** upon UV and Vis irradiation.

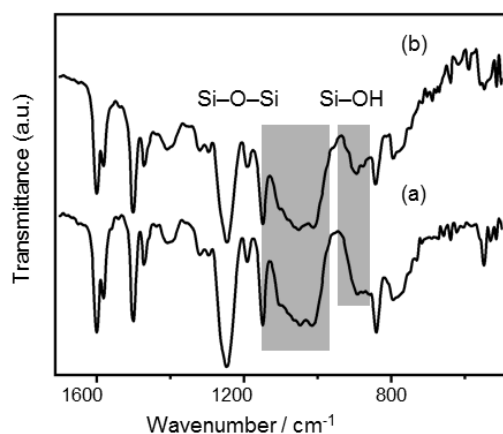

**Fig. S7** FT-IR spectra of **F2** (a) before and (b) after UV/Vis irradiation.

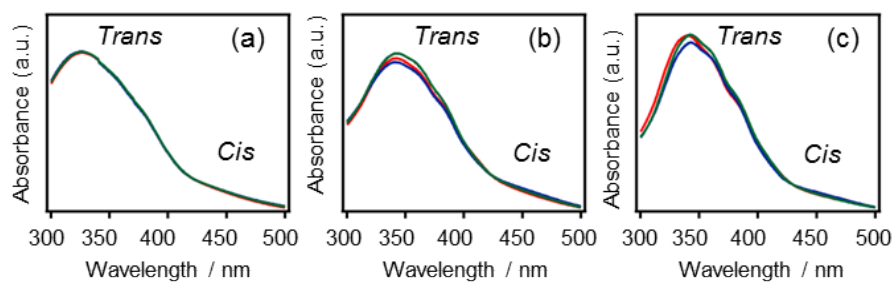

**Fig. S8** UV-Vis spectra of (a) **F1'**, (b) **F2'**, and (c) **F3'** before irradiation (red), after 5 min of UV irradiation (blue), and after a further 5 min of visible light irradiation (green).
